# Supplementary material
Source: HighWire-hosted journal article supplement (doi:10.1101/rna.056218.116)
Supplement: Supplemental_Material.docx [file Supplemental_Material.docx]

*SUPPLEMENTAL FIGURES FOR:*

**mRNA bound to the 30S subunit is a HigB toxin substrate**

**Content:**

Supplemental figures S1 & S2

Marc A. Schureck, Tatsuya Maehigashi, Stacey J. Miles, Jhomar Marquez and Christine M. Dunham*

Emory University School of Medicine, Department of Biochemistry, 1510 Clifton Road NE,

Room G223, Atlanta, GA 30322 USA

*****Correspondence to christine.m.dunham@emory.edu, phone +1 404-712-1756,

fax +1 404-727-2738

Data deposition: Crystallography, atomic coordinates, and structure factors have been deposited in the Protein Data Bank, www.pdb.org (PDB code 4YY3)

**Running title:** 30S-HigB toxin interactions

**Keywords:** toxin-antitoxin modules, stringent response, RNase, ribosome, protein synthesis, mRNA

**SUPPLEMENTAL FIGURES & LEGENDS**

**
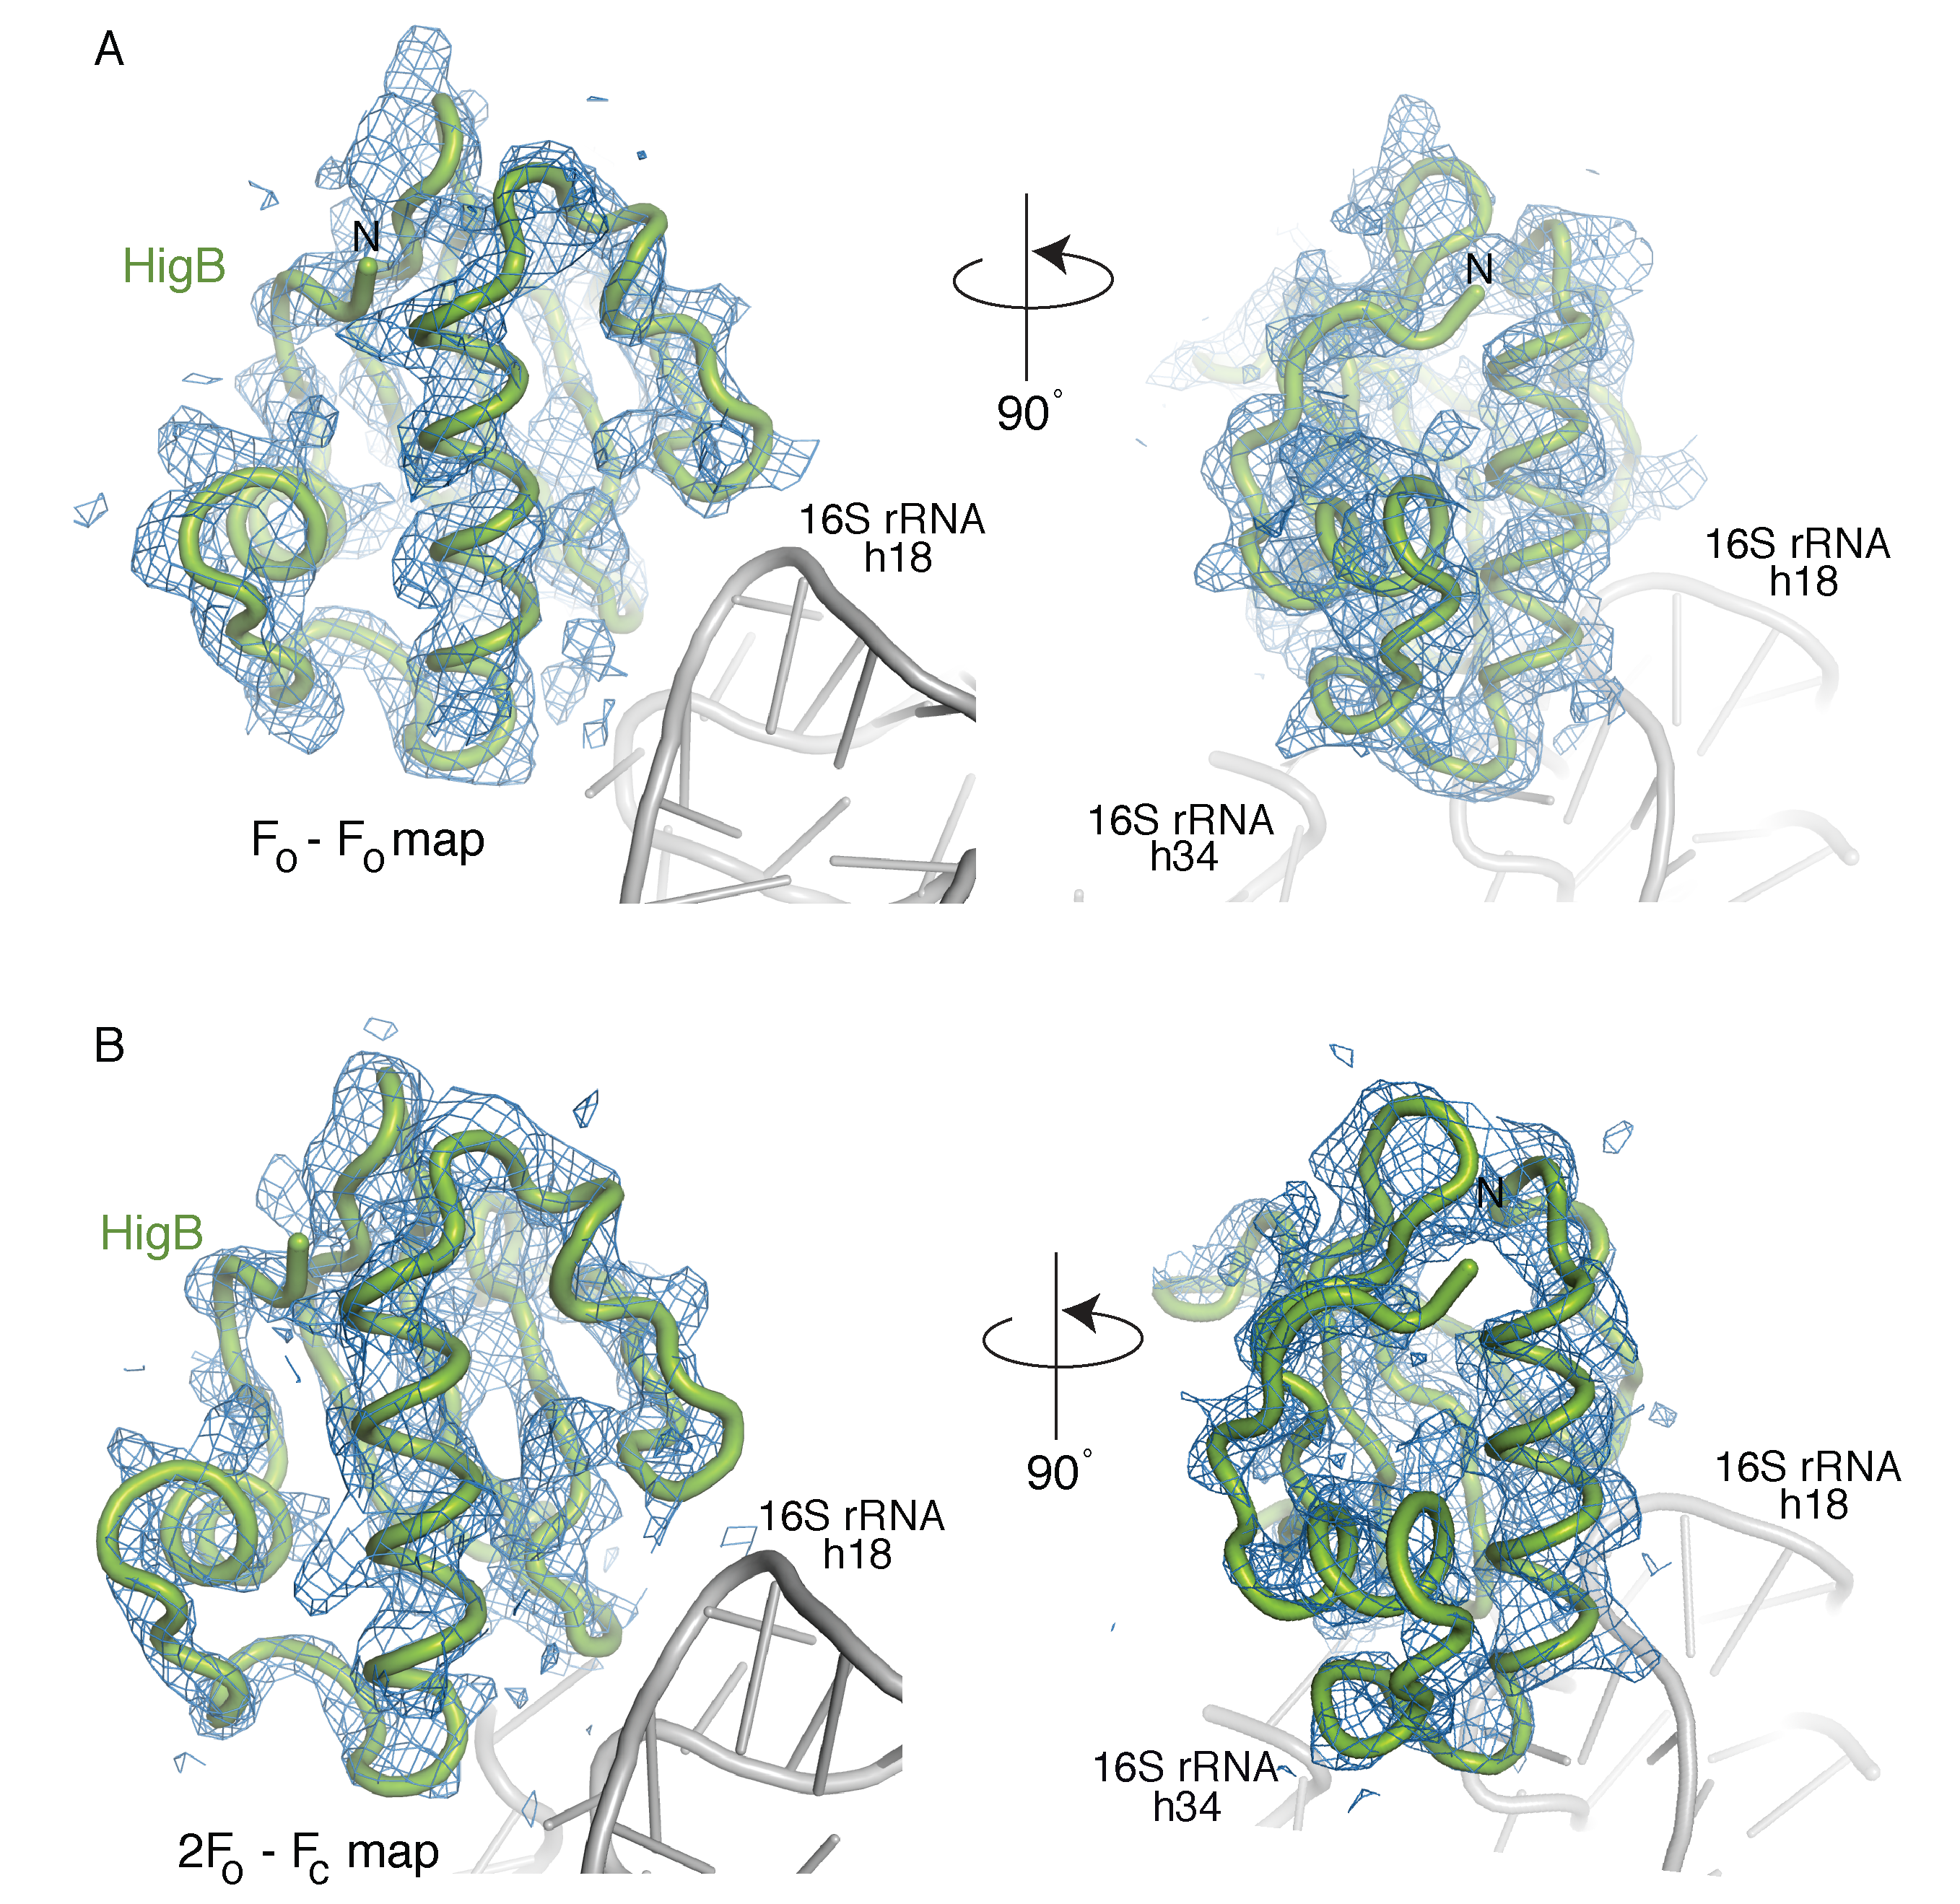
**

**Supplementary Fig. S1. Electron density maps of HigB bound to the 30S subunit**. A3.6-Å X-ray crystal structure of the 30S-HigB toxin. A)Unbiased Fobs-Fobs difference electron density (contoured to 1.5σ) of the HigB toxin with a 90° rotation (right panel). B) 2Fobs-Fcalc electron density for HigB (contoured to 1.0σ) with a 90° rotation (right panel).


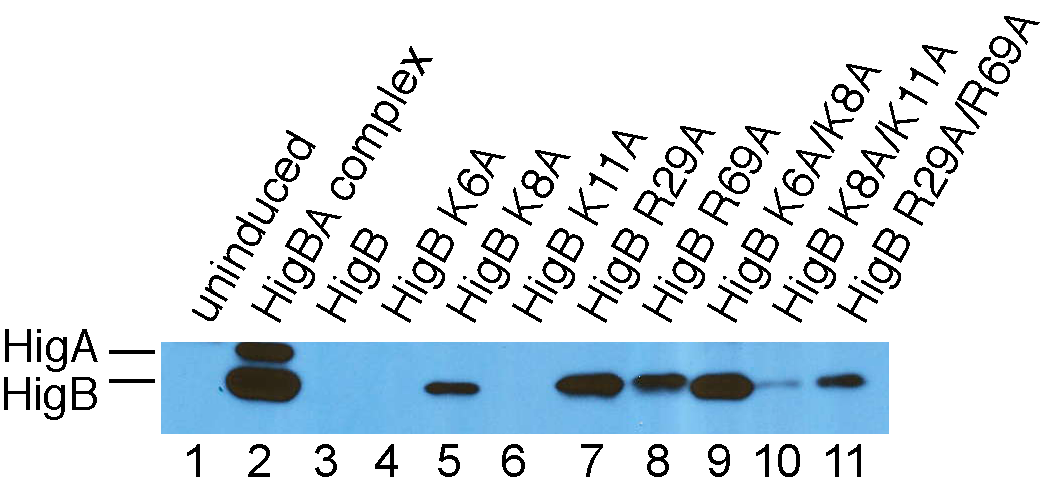


**Supplementary Fig. S2. Western blot analysis of the soluble fraction from *E. coli* growth assays upon overexpression of wild-type HigB and HigB variants.** Aliquots at 4 hrs postinduction of wild-type HigB or HigB variants were collected, cells were lysed, debris was removed by centrifugation, and the soluble fraction were resolved by SDS-PAGE. The expression of HigB was determined by using polyclonal antibodies against the HigBA toxin-antitoxin complex. Overexpression of wild-type HigB halts cell growth and no soluble HigB protein is detected (lane 3) likely due to the effect of HigB-mediated translational repression similar to overexpression of the MqsR toxin (Brown et al. 2009). Recombinant HigBA complex is shown as a standard in lane 2 where HigA(His)6 and HigB are 13.5 and 10.7 kDa, respectively.

**REFERENCES**

Brown BL, Grigoriu S, Kim Y, Arruda JM, Davenport A, Wood TK, Peti W, Page R. 2009. Three dimensional structure of the MqsR:MqsA complex: a novel TA pair comprised of a toxin homologous to RelE and an antitoxin with unique properties. *PLoS Pathog* **5**: e1000706.
